# Supplementary material for: The implications of autoantibodies to a single islet antigen in relatives with normal glucose tolerance: development of other autoantibodies and progression to type 1 diabetes
Source: PubMed Central journal article supplement (PMC4742489; doi:10.1007/s00125-015-3830-2), 2015-12-16
Supplement: 125_2015_3830_MOESM1_ESM.pdf [file 125_2015_3830_MOESM1_ESM.pdf]

**ESM Supplementary Table:** Islet autoantibodies detected in follow-up samples in 118 single antibody positive individuals who developed confirmed multiple autoantibodies

| <i>Islet autoantibodies detected in follow-up samples</i> | <i>n</i> | <i>First islet autoantibodies detected</i> |     |              |
|-----------------------------------------------------------|----------|--------------------------------------------|-----|--------------|
|                                                           |          | GADA                                       | IAA | IA-2A/ICA512 |
| GADA/IAA                                                  | 20       | 8                                          | 12  |              |
| GADA/IA-2A                                                | 8        | 5                                          | 1   | 2            |
| GADA/ZnT8A                                                | 7        | 7                                          |     |              |
| GADA/ICA                                                  | 40       | 40                                         |     |              |
| IAA/IA-2A                                                 |          |                                            |     |              |
| IAA/ZnT8A                                                 |          |                                            |     |              |
| IAA/ICA                                                   | 4        | 1                                          | 3   |              |
| IA-2A/ZnT8A                                               | 1        |                                            |     | 1            |
| IA-2A/ICA                                                 | 2        |                                            |     | 2            |
| GADA/IAA/IA-2A                                            | 2        |                                            | 2   |              |
| GADA/IAA/ZnT8A                                            |          |                                            |     |              |
| GADA/IAA/ICA                                              | 5        | 2                                          | 3   |              |
| GADA/IA-2A/ZnT8A                                          | 2        | 2                                          |     |              |
| GADA/IA-2A/ICA                                            | 6        | 4                                          |     | 2            |
| GADA/ZnT8A/ICA                                            | 2        | 2                                          |     |              |
| IAA/IA-2A/ZnT8A                                           |          |                                            |     |              |
| IAA/IA-2A/ICA                                             |          |                                            |     |              |
| IA-2A/ZnT8A/ICA                                           | 1        |                                            |     | 1            |
| GADA/IAA/IA-2A/ZnT8A                                      |          |                                            |     |              |
| GADA/IAA/IA-2A/ICA                                        | 4        | 2                                          | 2   |              |
| GADA/IAA/ZnT8A/ICA                                        | 3        | 1                                          | 2   |              |
| GADA/IA-2A/ZnT8A/ICA                                      | 8        | 7                                          |     | 1            |
| IAA/IA-2A/ZnT8A/ICA                                       | 1        |                                            | 1   |              |
| GADA/IAA/IA-2A/ZnT8A/ICA                                  | 2        | 1                                          | 1   |              |
|                                                           | 118      | 82                                         | 27  | 9            |
